# Supplementary material for: Development and Characterization of Membranes with PVA Containing Silver Particles: A Study of the Addition and Stability
Source: PubMed Central journal article supplement (PMC7565032; doi:10.3390/polym12091937), 2020-08-27
Supplement: polymers-12-01937-s001.pdf [file polymers-12-01937-s001.pdf]

## Supplementary Materials

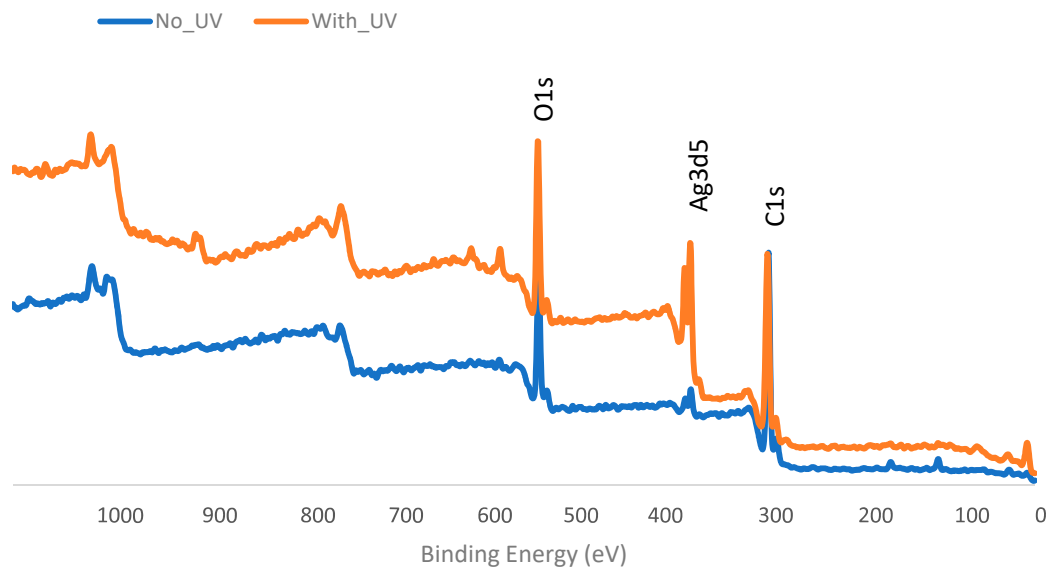

**Fig S1.** XPS spectra of PVA-Ag and PVA-UV of spectral region 0-1000 eV.

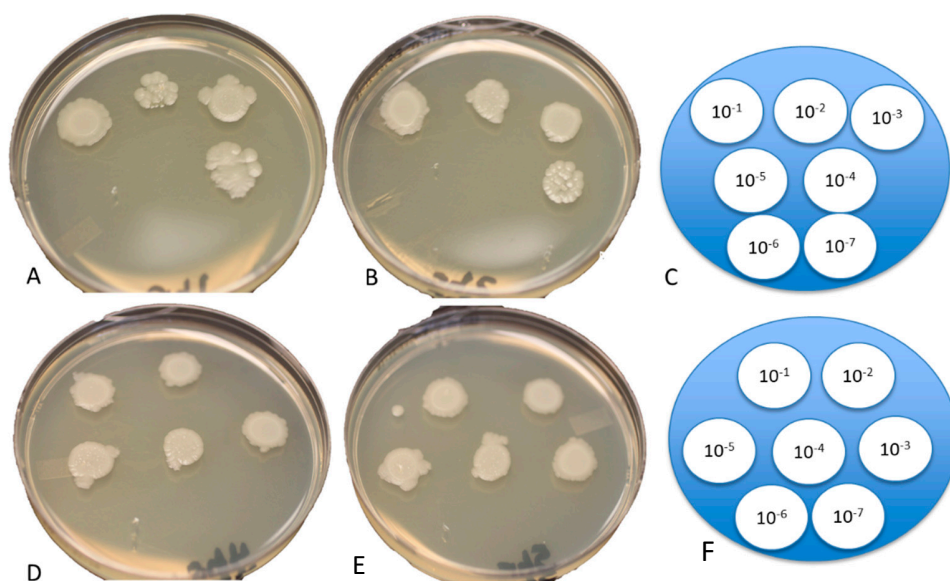

**Fig S2.** Bacteria plating following incubation with membrane embedded with silver (A) 1 hour post exposure, (B) 2 hours post exposure, (D) 4 hours post exposure and (E) 5 hours exposure, and maps of dilution colonies (C and F).

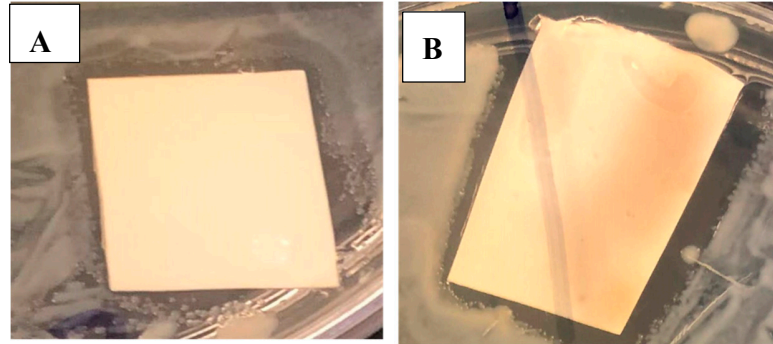

**Fig S3.** Anti-bacteria effect on *E. coli* with membrane without membrane (A) and embedded with silver (B).
